# Supplementary material for: Admission Serum Total Brain-Derived Neurotrophic Factor and Angiographic No-Reflow in Non-ST-Segment Elevation Myocardial Infarction Undergoing Percutaneous Coronary Intervention
Source: MDPI journal article supplement (doi:10.3390/medicina62071211), 2026-06-23
Supplement: s1 [file medicina-4369168-supplementary.pdf › medicina-4369168-supplementary.pdf]

## Supplementary Materials

**Table S1. NRF phenotype and BDNF quartile gradient.**

| Item                         | Category              | n/N (%) or value |
|------------------------------|-----------------------|------------------|
| Primary endpoint             | Any angiographic NRF  | 114/700 (16.3)   |
| Final TIMI flow in NRF cases | TIMI 0-1              | 14/114 (12.3)    |
| Final TIMI flow in NRF cases | TIMI 2                | 59/114 (51.8)    |
| Final TIMI flow in NRF cases | TIMI 3 with MBG 0-1   | 41/114 (36.0)    |
| BDNF quartile 1              | $\leq 310$ pg/mL      | 12/175 (6.9)     |
| BDNF quartile 2              | 311-407 pg/mL         | 19/175 (10.9)    |
| BDNF quartile 3              | 408-532 pg/mL         | 30/175 (17.1)    |
| BDNF quartile 4              | $> 532$ pg/mL         | 53/175 (30.3)    |
| Trend test                   | Across BDNF quartiles | $p < 0.001$      |

**Table S2. Spearman correlation between serum total BDNF and selected parameters.**

| <b>Variable</b>          | <b>Spearman r</b> | <b>p value</b> |
|--------------------------|-------------------|----------------|
| Age                      | 0.08              | 0.041          |
| eGFR                     | -0.20             | <0.001         |
| WBC                      | 0.20              | <0.001         |
| NLR                      | 0.23              | <0.001         |
| hs-CRP                   | 0.32              | <0.001         |
| Peak hs-cTnI             | 0.27              | <0.001         |
| NT-proBNP                | 0.25              | <0.001         |
| Platelet count           | 0.17              | <0.001         |
| MPV                      | 0.21              | <0.001         |
| PDW                      | 0.18              | <0.001         |
| LVEF                     | -0.35             | <0.001         |
| Baseline TIMI flow grade | -0.30             | <0.001         |
| SYNTAX score             | 0.19              | <0.001         |
| Lesion length            | 0.16              | <0.001         |
| High thrombus burden     | 0.24              | <0.001         |

**Table S3. Univariable logistic regression for angiographic NRF.**

| Variable                    | Unit/category                        | OR   | 95% CI    | p value |
|-----------------------------|--------------------------------------|------|-----------|---------|
| BDNF                        | per 100 pg/mL increase               | 1.78 | 1.54-2.06 | <0.001  |
| Age                         | per 10-year increase                 | 1.35 | 1.11-1.63 | 0.002   |
| Male sex                    | yes vs. no                           | 0.92 | 0.59-1.43 | 0.724   |
| Diabetes mellitus           | yes vs. no                           | 1.74 | 1.16-2.60 | 0.007   |
| Hypertension                | yes vs. no                           | 1.30 | 0.87-1.94 | 0.205   |
| BMI                         | per 1 kg/m <sup>2</sup>              | 1.03 | 0.98-1.08 | 0.238   |
| Symptom-to-angiography time | per 6 h increase                     | 1.16 | 1.08-1.25 | <0.001  |
| eGFR                        | per 10 mL/min decrease               | 1.43 | 1.24-1.65 | <0.001  |
| hs-CRP                      | per ln-unit increase                 | 1.74 | 1.41-2.14 | <0.001  |
| WBC                         | per 1 x10 <sup>3</sup> /uL increase  | 1.17 | 1.09-1.26 | <0.001  |
| NLR                         | per ln-unit increase                 | 1.66 | 1.32-2.08 | <0.001  |
| Hemoglobin                  | per 1 g/dL decrease                  | 1.26 | 1.10-1.45 | 0.001   |
| Platelet count              | per 50 x10 <sup>3</sup> /uL increase | 1.23 | 1.08-1.40 | 0.002   |
| MPV                         | per 1 fL increase                    | 1.45 | 1.18-1.78 | <0.001  |
| LVEF                        | per 5% decrease                      | 1.61 | 1.39-1.87 | <0.001  |
| Peak hs-cTnI                | per ln-unit increase                 | 1.35 | 1.16-1.58 | <0.001  |
| Baseline TIMI 0-1           | yes vs. no                           | 3.14 | 2.04-4.83 | <0.001  |
| High thrombus burden        | yes vs. no                           | 3.62 | 2.28-5.75 | <0.001  |
| SYNTAX score                | per 5-point increase                 | 1.47 | 1.27-1.71 | <0.001  |
| Lesion length               | per 5-mm increase                    | 1.45 | 1.28-1.65 | <0.001  |
| Multivessel disease         | yes vs. no                           | 1.43 | 0.96-2.13 | 0.080   |

**Table S4. Calibration and internal validation of the final BDNF-enriched Model 4.**

| Validation method         | Statistic                            | Value         |
|---------------------------|--------------------------------------|---------------|
| Apparent performance      | AUC                                  | 0.866         |
| Apparent performance      | Brier score                          | 0.085         |
| Apparent performance      | Calibration intercept                | -0.02         |
| Apparent performance      | Calibration slope                    | 0.97          |
| Hosmer-Lemeshow test      | chi-square (df=8), p                 | 6.28, p=0.620 |
| Bootstrap, 1000 resamples | Mean optimism                        | 0.014         |
| Bootstrap, 1000 resamples | Optimism-corrected AUC               | 0.852         |
| Bootstrap, 1000 resamples | Optimism-corrected calibration slope | 0.92          |
| Bootstrap, 1000 resamples | Optimism-corrected Brier score       | 0.090         |
| 10-fold cross-validation  | Mean AUC                             | 0.845         |
| 10-fold cross-validation  | AUC range across folds               | 0.809-0.876   |
| 10-fold cross-validation  | Mean calibration slope               | 0.90          |
| 10-fold cross-validation  | Mean Brier score                     | 0.092         |
| Shrinkage estimate        | Uniform shrinkage factor             | 0.92          |

**Table S5. Incremental value of adding BDNF to clinical and clinical-angiographic models.**

| <b>Comparison</b>                             | <b>Delta AUC</b> | <b>p value</b> | <b>Continuous NRI<br/>(95% CI)</b> | <b>p value</b> | <b>IDI (95% CI)</b> | <b>p value</b> |
|-----------------------------------------------|------------------|----------------|------------------------------------|----------------|---------------------|----------------|
| Model 4 with BDNF vs Model 4 without BDNF     | +0.032           | 0.005          | 0.238 (0.096-0.380)                | 0.001          | 0.049 (0.025-0.073) | <0.001         |
| BDNF + clinical model vs clinical model alone | +0.087           | <0.001         | 0.326 (0.178-0.474)                | <0.001         | 0.066 (0.038-0.094) | <0.001         |

**Table S6. Sensitivity and robustness analyses for BDNF as a predictor of NRF.**

| <b>Analysis</b>                                 | <b>BDNF effect estimate</b> | <b>95% CI</b> | <b>p value</b> | <b>Comment</b>                             |
|-------------------------------------------------|-----------------------------|---------------|----------------|--------------------------------------------|
| BDNF per 100 pg/mL in Model 4                   | OR 1.31                     | 1.07-1.60     | 0.009          | Primary analysis                           |
| BDNF log-transformed                            | OR 1.82                     | 1.20-2.75     | 0.004          | Consistent after skewness adjustment       |
| BDNF highest quartile vs lower three quartiles  | OR 2.01                     | 1.14-3.54     | 0.016          | Threshold-like gradient                    |
| Replacing hs-CRP with NLR                       | OR 1.32                     | 1.08-1.61     | 0.007          | Stable alternative inflammatory adjustment |
| Adding MPV to the final model                   | OR 1.29                     | 1.05-1.59     | 0.016          | Not fully explained by platelet indices    |
| Excluding patients with rescue GP IIb/IIIa use  | OR 1.28                     | 1.03-1.59     | 0.026          | Not driven by bailout pharmacology         |
| Excluding baseline TIMI 0-1 culprit lesions     | OR 1.27                     | 1.00-1.61     | 0.049          | Persists in non-occlusive baseline flow    |
| Using final TIMI <3 only as endpoint            | OR 1.36                     | 1.06-1.74     | 0.015          | Robust with stricter endpoint              |
| Replacing SYNTAX score with multivessel disease | OR 1.33                     | 1.09-1.63     | 0.005          | Stable alternative anatomic adjustment     |
| Complete-case analysis only                     | OR 1.30                     | 1.06-1.60     | 0.012          | Similar to primary analysis                |

**Table S7. Multicollinearity diagnostics and missing-data summary for the final model.**

| Variable                    | Tolerance | VIF  | Missing, n (%) |
|-----------------------------|-----------|------|----------------|
| BDNF                        | 0.80      | 1.25 | 0 (0.0)        |
| Age                         | 0.84      | 1.19 | 0 (0.0)        |
| Diabetes mellitus           | 0.87      | 1.15 | 0 (0.0)        |
| eGFR                        | 0.76      | 1.32 | 2 (0.3)        |
| hs-CRP                      | 0.70      | 1.43 | 18 (2.6)       |
| WBC                         | 0.72      | 1.39 | 0 (0.0)        |
| Hemoglobin                  | 0.88      | 1.14 | 0 (0.0)        |
| Platelet count              | 0.84      | 1.19 | 0 (0.0)        |
| LVEF                        | 0.74      | 1.35 | 9 (1.3)        |
| Peak hs-cTnI                | 0.78      | 1.28 | 5 (0.7)        |
| Symptom-to-angiography time | 0.82      | 1.22 | 4 (0.6)        |
| Baseline TIMI 0-1           | 0.79      | 1.27 | 0 (0.0)        |
| High thrombus burden        | 0.77      | 1.30 | 0 (0.0)        |
| SYNTAX score                | 0.68      | 1.47 | 0 (0.0)        |
| Lesion length               | 0.70      | 1.43 | 0 (0.0)        |

**Table S8. Exploratory comparison of BDNF with simple laboratory-marker models.**

| Model                                | AUC (95% CI)        | Delta AUC | p value | Sensitivity (%) | Specificity (%) |
|--------------------------------------|---------------------|-----------|---------|-----------------|-----------------|
| hs-CRP + platelet count              | 0.732 (0.681-0.783) | Reference | -       | 66.7            | 69.8            |
| hs-CRP + platelet count + BDNF       | 0.812 (0.770-0.854) | +0.080    | <0.001  | 73.7            | 77.0            |
| hs-CRP + platelet count + MPV        | 0.754 (0.704-0.803) | Reference | -       | 68.4            | 70.6            |
| hs-CRP + platelet count + MPV + BDNF | 0.819 (0.778-0.860) | +0.065    | <0.001  | 74.6            | 77.8            |
| BDNF alone                           | 0.787 (0.742-0.833) | -         | -       | 70.2            | 74.1            |

AUC: area under the curve; BDNF: brain-derived neurotrophic factor; hs-CRP: high-sensitivity C-reactive protein; MPV: mean platelet volume. These analyses were exploratory and were performed to evaluate whether the BDNF signal duplicated simple inflammatory and platelet-related laboratory information.

## Supplementary Figures

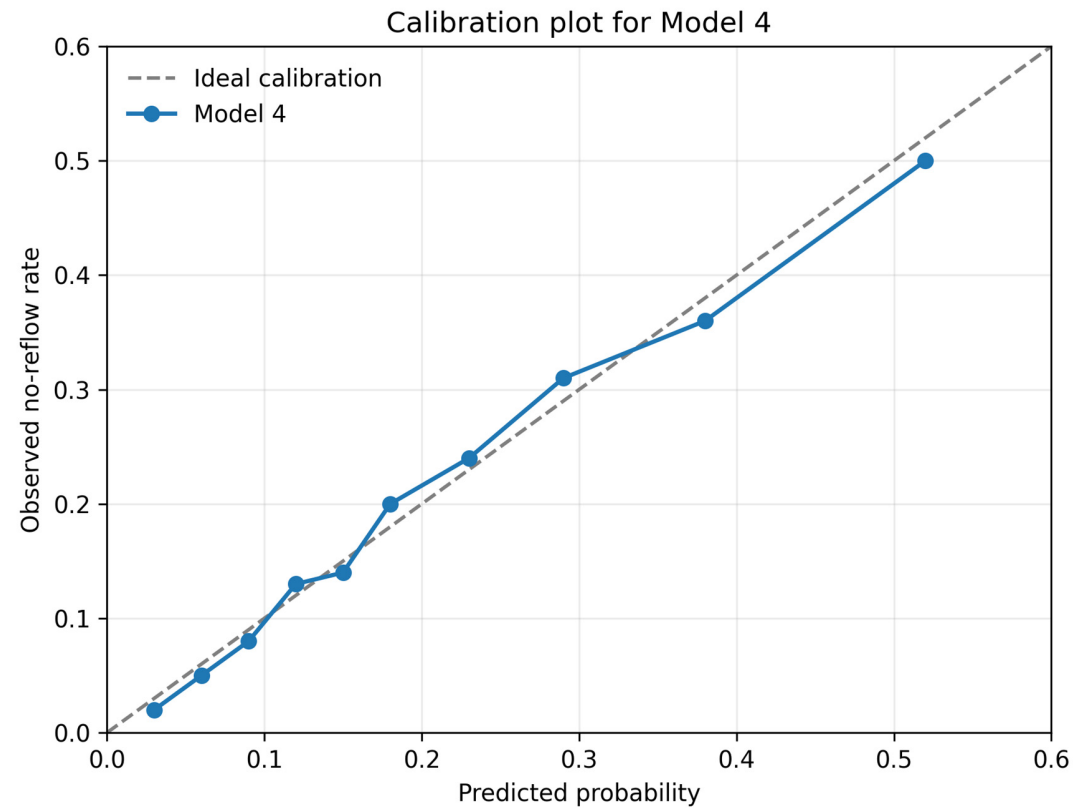

**Figure S1.** Calibration plot for Model 4. Points represent observed NRF rates across deciles of predicted probability.



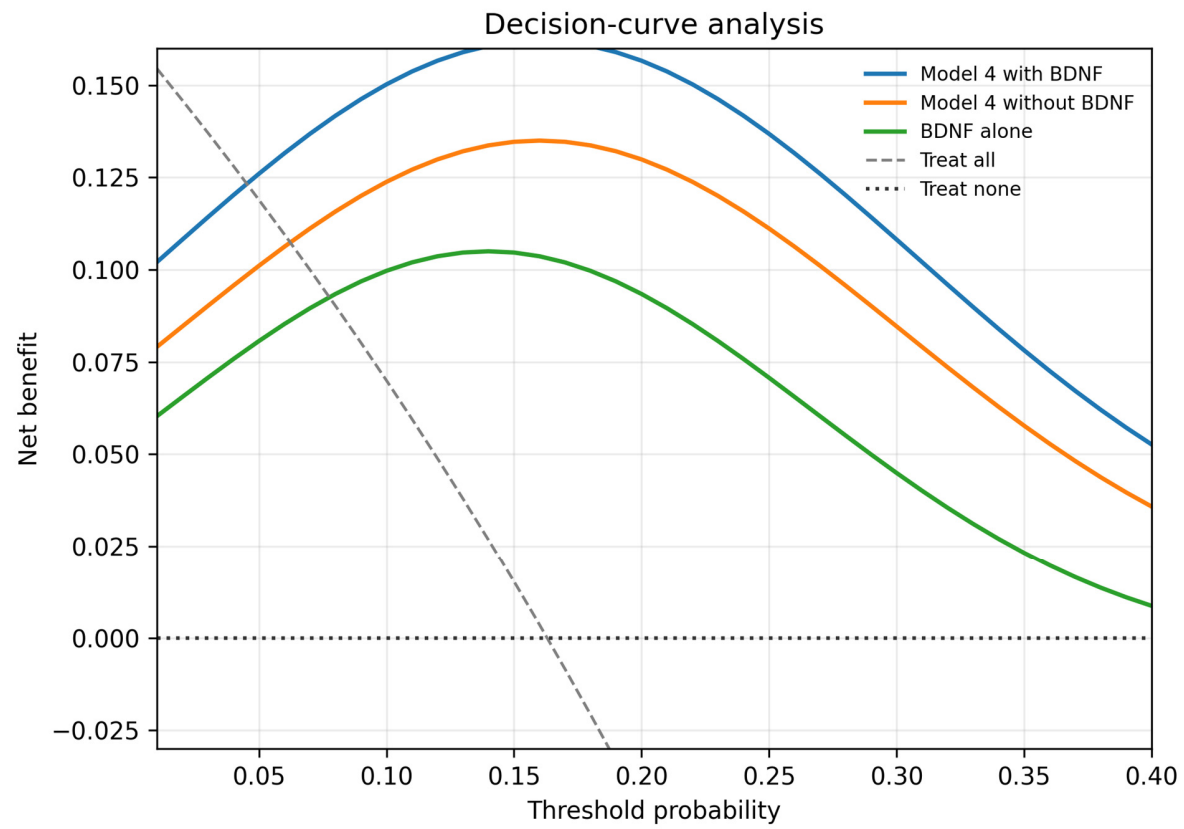

**Figure S2.** Decision-curve analysis comparing Model 4 with BDNF, Model 4 without BDNF, BDNF alone, treat-all, and treat-none strategies.
